# Supplementary material for: Natural Chain-Breaking Antioxidants and Their Synthetic Analogs as Modulators of Oxidative Stress
Source: MDPI journal article supplement (doi:10.3390/antiox10040624), 2021-04-19
Supplement: s1 [file s1]

## **Natural chain-breaking antioxidants and their synthetic analogs as modulators of oxidative stress**

***Vessela D. Kancheva<sup>1\*</sup>, Maria Antonietta Dettori<sup>2</sup>, Davide Fabbri<sup>2</sup>, Petko Alov<sup>3</sup>,  
Silvia E. Angelova<sup>4\*</sup>, Adriana K.Slavova-Kazakova<sup>1</sup>, Paola Carta<sup>2</sup>, Valerii A.  
Menshov<sup>5</sup>, Olga I. Yablonskaya<sup>5</sup>, Aleksei V. Trofimov<sup>5,6</sup>, Ivanka Tsakovska<sup>3</sup>, Luciano  
Saso<sup>7</sup>***

<sup>1</sup> Institute of Organic Chemistry with Centre of Phytochemistry, Bulgarian Academy of Sciences, "Acad. G. Bonchev" Str., bl.9, Sofia 1113, Bulgaria; vessy.kancheva@abv.bg, adriana.kazakova@orgchm.bas.bg

<sup>2</sup> CNR, Istituto di Chimica Biomolecolare, Traversa La Crucca 3, 07100 Sassari, Italy, mariaantonietta.dettori@cnr.it, davidegaetano.fabbri@cnr.it, paola.carta@cnr.it

<sup>3</sup> Institute of Biophysics and Biomedical Engineering, Bulgarian Academy of Sciences, "Acad. G. Bonchev" Str., bl.21, 1113 Sofia, Bulgaria; petko@biophys.bas.bg, itsakovska@biomed.bas.bg

<sup>4</sup> Institute of Optical Materials and Technologies "Acad. J. Malinovski", Bulgarian Academy of Sciences, "Acad. G. Bonchev" Str., bl.109, 1113 Sofia, Bulgaria, sea@iomt.bas.bg

<sup>5</sup> Emanuel Institute of Biochemical Physics, Russian Academy of Sciences, "Kosigina"4 Str., 119334 Moscow, Russian Federation, vinoman66@mail.ru, olga.yablonsky@gmail.com, avt\_2003@mail.ru

<sup>6</sup> Moscow Institute of Physics and Technology (National Research University), Dolgoprudny, Moscow Region, Institutskiy per. 9, 141701, Russia

<sup>7</sup> Department of Physiology and Pharmacology "Vittorio Erspamer", Sapienza University P.le Aldo Moro 5, 00185, Rome, Italy; luciano.saso@uniroma1.it

Correspondence authors: Prof. Vessela D. Kancheva, PhD, (Former family name Kortenska)  
Phone: +359 988934995; fax: +359 28700225; e-mail: vessy.kancheva@abv.bg; Assoc. Prof.  
Silvia E. Angelova, PhD, Phone: +359888726508; e-mail: sea@iomt.bas.bg

## Contents

|                                                                                                                                            |     |
|--------------------------------------------------------------------------------------------------------------------------------------------|-----|
| 1. Nonsystematic and systematic names of the studied compounds.....                                                                        | S3  |
| 2. Spectral characterization of the newly synthesized compounds:.....                                                                      | S5  |
| 2.1. Compounds M4, M6 and M7 .....                                                                                                         | S5  |
| 2.2. Compounds D4 and D6 .....                                                                                                             | S5  |
| 2.3. Compounds DisoEu, DHCh, DCA and DHCA .....                                                                                            | S5  |
| 2.4. $^1\text{H}$ and $^{13}\text{C}$ NMR spectra .....                                                                                    | S7  |
| 3. Lipid autoxidation .....                                                                                                                | S12 |
| 3.1. Lipid sample .....                                                                                                                    | S12 |
| 3.2. Lipid autoxidation .....                                                                                                              | S13 |
| 3.3. Determination of the main kinetic parameters of the studied compounds .....                                                           | S14 |
| 4. Estimation of rate constant of antioxidant reaction with peroxy radicals ( $k_A$ )<br>using kinetic chemiluminescence (CL) method ..... | S15 |
| 5. DFT computational studies .....                                                                                                         | S17 |
| References.....                                                                                                                            | S19 |

## 1. Nonsystematic and systematic names of the studied compounds.

**Table S1.** All the studied compounds summarized with their names according IUPAC nomenclature, trivial names and their abbreviations:

| Abbr.         | Nonsystematic/trivial name | IUPAC systematic name                                                                                                       |
|---------------|----------------------------|-----------------------------------------------------------------------------------------------------------------------------|
| <b>FA</b>     | Ferulic Acid               | (E)-3-(4-hydroxy-3-methoxyphenyl)prop-2-enoic acid                                                                          |
| <b>DFA</b>    |                            | (2E,2'E)-3,3'-(6,6'-dihydroxy-5,5'-dimethoxy-[1,1'-biphenyl]-3,3'-diyl)diacrylic acid                                       |
| <b>CA</b>     | Caffeic Acid               | (E)-3-(3,4-dihydroxyphenyl)acrylic acid                                                                                     |
| <b>DCA</b>    |                            | (2E,2'E)-3,3'-(5,5',6,6'-tetrahydroxy-[1,1'-biphenyl]-3,3'-diyl)diacrylic acid                                              |
| <b>Cr</b>     | Creosol                    | 2-methoxy-4-methylphenol                                                                                                    |
| <b>DCr</b>    |                            | 3,3'-dimethoxy-5,5'-dimethyl-[1,1'-biphenyl]-2,2'-diol                                                                      |
| <b>Va</b>     | Vanillin                   | 4-hydroxy-3-methoxybenzaldehyde                                                                                             |
| <b>DVa</b>    |                            | 6,6'-dihydroxy-5,5'-dimethoxy-[1,1'-biphenyl]-3,3'-dicarbaldehyde                                                           |
| <b>Apo</b>    | Apocinin                   | 1-(4-hydroxy-3-methoxyphenyl)ethanone                                                                                       |
| <b>DApo</b>   |                            | 1,1'-(6,6'-dihydroxy-5,5'-dimethoxy-[1,1'-biphenyl]-3,3'-diyl)diethanone                                                    |
| <b>Eu</b>     | Eugenol                    | 2-methoxy-4-prop-2-enylphenol                                                                                               |
| <b>DEu</b>    |                            | 5,5'-diallyl-3,3'-dimethoxy-[1,1'-biphenyl]-2,2'-diol                                                                       |
| <b>isoEu</b>  | iso-Eugenol                | 2-methoxy-4-[(E)-prop-1-enyl]phenol                                                                                         |
| <b>DisoEu</b> |                            | 3,3'-dimethoxy-5,5'-di((E)-prop-1-en-1-yl)-[1,1'-biphenyl]-2,2'                                                             |
| <b>M1</b>     | Dehydrozingerone           | (E)-4-(4-hydroxy-3-methoxyphenyl)but-3-en-2-one                                                                             |
| <b>D1</b>     |                            | (3E,3'E)-4,4'-(6,6'-dihydroxy-5,5'-dimethoxy-[1,1'-biphenyl]-3,3'-diyl)bis(but-3-en-2-one)                                  |
| <b>M2</b>     | Zingerone                  | 4-(4-hydroxy-3-methoxyphenyl)butan-2-one                                                                                    |
| <b>D2</b>     |                            | 4,4'-(6,6'-dihydroxy-5,5'-dimethoxy-[1,1'-biphenyl]-3,3'-diyl)bis(butan-2-one)                                              |
| <b>M3</b>     |                            | (2Z,5E)-ethyl 2-hydroxy-6-(4-hydroxy-3-methoxyphenyl)-4-oxohexa-2,5-dienoate                                                |
| <b>D3</b>     |                            | (2Z,2'Z,5E,5'E)-diethyl 6,6'-(6,6'-dihydroxy-5,5'-dimethoxy-[1,1'-biphenyl]-3,3'-diyl)bis(2-hydroxy-4-oxohexa-2,5-dienoate) |

|             |          |                                                                                                                                                         |
|-------------|----------|---------------------------------------------------------------------------------------------------------------------------------------------------------|
| <b>M4</b>   |          | (Z)-5-hydroxy-1-(4-hydroxy-3-methoxyphenyl)hex-4-en-3-one                                                                                               |
| <b>D4</b>   |          | (1E,4Z)-1-(2',6'-dihydroxy-5'-((Z)-5-hydroxy-3-oxohex-4-en-1-yl)-3',5'-dimethoxy-[1,1'-biphenyl]-3-yl)-5-hydroxyhexa-1,4-dien-3-one                     |
| <b>M5</b>   |          | (Z)-1-hydroxy-5-(4-hydroxy-3-methoxyphenyl)-1-phenylpent-1-en-3-one                                                                                     |
| <b>D5</b>   |          | (1Z,4E)-5-(2',6'-dihydroxy-5'-((Z)-5-hydroxy-3-oxo-5-phenylpent-4-en-1-yl)-3',5'-dimethoxy-[1,1'-biphenyl]-3-yl)-1-hydroxy-1-phenylpenta-1,4-dien-3-one |
| <b>M6</b>   |          | (1E,4Z)-5-hydroxy-1-(4-hydroxy-3-methoxyphenyl)hexa-1,4-dien-3-one                                                                                      |
| <b>D6</b>   |          | (1E,1'E,4Z,4'Z)-1,1'-(6,6'-dihydroxy-5,5'-dimethoxy-[1,1'-biphenyl]-3,3'-diyl)bis(5-hydroxyhexa-1,4-dien-3-one)                                         |
| <b>M7</b>   |          | (1E,4Z)-5-hydroxy-1-(4-hydroxy-3-methoxyphenyl)hepta-1,4-dien-3-one                                                                                     |
| <b>M8</b>   |          | (1Z,4E)-1-hydroxy-5-(4-hydroxy-3-methoxyphenyl)-1-(p-tolyl)penta-1,4-dien-3-one                                                                         |
| <b>D8</b>   |          | (1Z,1'Z)-5,5'-(6,6'-dihydroxy-5,5'-dimethoxy-[1,1'-biphenyl]-3,3'-diyl)bis(1-hydroxy-1-(p-tolyl)pent-1-en-3-one)                                        |
| <b>M9</b>   |          | (1Z,4E)-1-(4-(tert-butyl)phenyl)-1-hydroxy-5-(4-hydroxy-3-methoxyphenyl)penta-1,4-dien-3-one                                                            |
| <b>D9</b>   |          | (1Z,1'Z)-5,5'-(6,6'-dihydroxy-5,5'-dimethoxy-[1,1'-biphenyl]-3,3'-diyl)bis(1-(4-(tert-butyl)phenyl)-1-hydroxypent-1-en-3-one)                           |
| <b>HCh</b>  | Chavicol | (E)-4-(prop-1-en-1-yl)benzene-1,2-diol                                                                                                                  |
| <b>DHCh</b> |          | 5,5'-di((E)-prop-1-en-1-yl)-[1,1'-biphenyl]-2,2',3,3'-tetraol                                                                                           |
| <b>HPh</b>  |          | (E)-4-(3,4-dihydroxyphenyl)but-3-en-2-one                                                                                                               |
| <b>DHPh</b> |          | (3E,3'E)-4,4'-(5,5',6,6'-tetrahydroxy-[1,1'-biphenyl]-3,3'-diyl)bis(but-3-en-2-one)                                                                     |
| <b>HFA</b>  |          | 3-(4-hydroxy-3-methoxyphenyl)propanoic acid                                                                                                             |
| <b>DHFA</b> |          | 3,3'-(6,6'-dihydroxy-5,5'-dimethoxy-[1,1'-biphenyl]-3,3'-diyl)dipropenoic acid                                                                          |
| <b>HCA</b>  |          | 3-(3,4-dihydroxyphenyl)propanoic acid                                                                                                                   |
| <b>DHCA</b> |          | 3,3'-(5,5',6,6'-tetrahydroxy-[1,1'-biphenyl]-3,3'-diyl)dipropenoic acid                                                                                 |
| <b>Curc</b> | Curcumin | (1E,6E)-1,7-bis(4-hydroxy-3-methoxyphenyl)hepta-1,6-diene-3,5-dione                                                                                     |

## 2. Spectral characterization of the newly synthesized compounds:

### 2.1. Compounds M4, M6 and M7

(Z)-5-hydroxy-1-(4-hydroxy-3-methoxyphenyl)hex-4-en-3-one **M4**. (85%): mp 38-40°C (lit.[1] 40-41 °C); (β-ketoenol tautomer): <sup>1</sup>H-NMR δ 2.03 (s, 3H), 2.55 (t, *J* = 7.7 Hz, 2H), 2.85 (t, *J* = 7.7 Hz, 2H), 3.87 (s, 3H), 5.45 (s, 1H), 6.50 (bs, 1H), 6.64 (dd, *J* = 2.0, 8.2 Hz, Ar, 1H), 6.65 (d, *J* = 2.0 Hz, 1H), 6.80 (d, *J* = 8.2 Hz, 1H); <sup>13</sup>C-NMR δ 24.82, 31.26, 41.38, 55.85, 100.01, 110.95, 114.32, 120.79, 132.60, 143.99, 146.41, 191.17, 193.25; Anal. Calcd. for C<sub>13</sub>H<sub>16</sub>O<sub>4</sub>: C, 66.09; H, 6.83; Found: C, 66.13; H, 6.96.

(Z)-1-hydroxy-5-(4-hydroxy-3-methoxyphenyl)-1-phenylpent-1-en-3-one **M6**. (64%): mp 142-143°C (lit.[2] 139.8-141.4 °C); (β-ketoenol tautomer): <sup>1</sup>H-NMR δ 2.16 (s, 3H), 3.94 (s, 3H), 5.63 (s, 1H), 6.03 (bs, 1H), 6.33 (d, *J*=16 Hz, 1H), 6.92 (d, *J*=8.2 Hz, 1H), 7.04 (d, *J*=1.9 Hz, 1H), 7.08 (dd, *J*=1.9, 8.2 Hz, 1H), 7.55 (d, *J*=16 Hz, 1H); <sup>13</sup>C-NMR δ 26.77, 55.91, 100.66, 109.51, 114.82, 120.28, 122.62, 127.63, 140.06, 146.81, 147.52, 177.96, 196.66; Anal. Calcd. for C<sub>13</sub>H<sub>14</sub>O<sub>4</sub>: C, 66.66; H, 6.02; Found: C, 66.63; H, 6.16.

(1E,4Z)-5-hydroxy-1-(4-hydroxy-3-methoxyphenyl)hepta-1,4-dien-3-one **M7**. (58%): mp 141-143°C; (β-ketoenol tautomer): <sup>1</sup>H-NMR δ 1.18 (t, *J*=7.5 Hz, 3H), 2.42 (q, *J*=7.5 Hz, 2H), 3.95 (s, 3H), 5.64 (s, 1H), 5.86 (bs, 1H), 6.34 (d, *J*=16 Hz, 1H), 6.92 (d, *J*=8.2 Hz, 1H), 7.03 (d, *J*=1.9 Hz, 1H), 7.09 (dd, *J*=1.9 Hz, 8.2 Hz, 1H), 7.52 (d, *J*=16 Hz, 1H); <sup>13</sup>C-NMR δ 9.44, 33.23, 55.96, 99.56, 109.48, 114.81, 120.50, 122.62, 127.77, 139.73, 146.78, 147.66, 177.70, 200.00; Anal. Calcd. for C<sub>14</sub>H<sub>16</sub>O<sub>4</sub>: C, 67.73; H, 6.50; Found: C, 67.75; H, 6.56.

### 2.2. Compounds D4 and D6

(1E,4Z)-1-(2',6'-dihydroxy-5'-((Z)-5-hydroxy-3-oxohex-4-en-1-yl)-3',5'-dimethoxy-[1,1'-biphenyl]-3-yl)-5-hydroxyhexa-1,4-dien-3-one **D4** (65%): mp 66-67 °C; (β-ketoenol tautomer): <sup>1</sup>H-NMR δ 2.03 (s, 6H), 2.59 (t, *J* = 7.2 Hz, 4H), 2.85 (t, *J* = 7.2 Hz, 4H), 3.89 (s, 6H), 5.48 (s, 2H), 6.10 (bs, 2H), 6.64 (s, 2H), 6.73 (s, 2H); <sup>13</sup>C-NMR δ 24.82, 31.36, 40.29, 56.09, 100.14, 110.55, 122.81, 124.45, 132.59, 141.01, 147.24, 191.14, 193.23; Anal. Calcd. for C<sub>26</sub>H<sub>30</sub>O<sub>8</sub>: C, 66.37; H, 6.43; Found: C, 66.33; H, 6.45.

(1E,1'E,4Z,4'Z)-1,1'-(6,6'-dihydroxy-5,5'-dimethoxy-[1,1'-biphenyl]-3,3'-diyl)bis(5-hydroxyhexa-1,4-dien-3-one) **D6** (64%): mp 170-171 °C; (β-ketoenol tautomer): <sup>1</sup>H-NMR (DMSO d<sub>6</sub>) δ 2.09 (s, 6H), 3.87 (s, 6H), 5.82 (s, 2H), 6.63 (d, *J*=15.6 Hz, 2H), 7.07 (d, *J*=2 Hz, 2H), 7.30 (d, *J*=2 Hz, 2H), 7.49 (d, *J*=15.6 Hz, 2H), 9.10 (bs, 2H); <sup>13</sup>C-NMR δ (DMSO d<sub>6</sub>) 26.91, 56.47, 100.99, 110.28, 120.30, 125.23, 125.82, 125.89, 140.73, 147.00, 148.31, 148.36, 178.62; Anal. Calcd. for C<sub>26</sub>H<sub>26</sub>O<sub>8</sub>: C, 66.94; H, 5.62; Found: C, 66.99; H, 6.66.

### 2.3. Compounds DisoEu, DHCh, DCA and DHCA

3,3'-dimethoxy-5,5'-di((E)-prop-1-en-1-yl)-[1,1'-biphenyl]-2,2'-**DisoEu**

<sup>1</sup>H-NMR δ (acetone d<sub>6</sub>) 1.85 (dd, *J*=1.6 Hz, 6.8 Hz, 6H), 3.93 (s, 6H), 5.62 (bs, OH), 6.10-6.18 (series of m, 2H), 6.34 (d, *J*=1.6 Hz, 2H), 6.85 (d, *J*=2.0 Hz, 2H), 7.01 (d, *J*=2.0 Hz, 2H); <sup>13</sup>C-NMR δ (acetone d<sub>6</sub>) 18.38, 56.03, 107.46, 121.56, 122.38, 125.23, 129.36, 131.12, 143.26, 147.84. Anal. Calcd. for C<sub>20</sub>H<sub>22</sub>O<sub>4</sub>: C, 73.60; H, 6.79; Found: C, 73.65; H, 6.83.

*5,5'-diallyl-[1,1'-biphenyl]-2,2',3,3'-tetraol DHCh*

<sup>1</sup>H-NMR δ (acetone d<sub>6</sub>) 3.31 (d, *J*=1.6. Hz, 4H), 5.04 (m, 2H), 5.93 (m, 4H), 6.71 (d, *J*=2.0. Hz, 2H), 6.78 (d, *J*=2.0. Hz, 2H), 7.87 (bs, 2 OH), 8.03 (bs, 2 OH), <sup>13</sup>C-NMR δ (acetone d<sub>6</sub>) 39.41, 114.45, 114.72, 121.72, 126.52, 132.46, 138.15, 139.75, 145.83. Anal. Calcd. for C<sub>18</sub>H<sub>18</sub>O<sub>4</sub> C, 72.47; H, 6.08; Found: C, 72.51; H, 6.11.

*(2E,2'E)-3,3'-(5,5',6,6'-tetrahydroxy-[1,1'-biphenyl]-3,3'-diyl)diacrylic acid DCA*

<sup>1</sup>H-NMR δ (DMSO d<sub>6</sub>) 6.15 (d, *J*=16.0 Hz, 2H), 6.89 (d, *J*=2.0 Hz, 2H), 7.02 (d, *J*=2.0 Hz, 2H), 7.41 (d, *J*=16.0 Hz, 2H); <sup>13</sup>C-NMR δ (DMSO d<sub>6</sub>) 113.08, 115.66, 123.98, 125.22, 126.32, 145.16, 145.97, 146.25, 168.40. Anal. Calcd. for C<sub>18</sub>H<sub>14</sub>O<sub>8</sub> C, 60.34; H, 3.94; Found: C, 60.44; H, 3.98

*3,3'-(5,5',6,6'-tetrahydroxy-[1,1'-biphenyl]-3,3'-diyl)dipropanoic acid DHCA*

<sup>1</sup>H NMR δ (MeOH d<sub>4</sub>) 2.24 (t, *J*=7.2 Hz, 4H), 2.61 (t, *J*=7.2 Hz, 4H), 6.34 (d, *J*=2.0. Hz, 2H), 6.57 (d, *J*=2.0. Hz, 2H); <sup>13</sup>C-NMR δ (MeOH d<sub>4</sub>) 23.90, 31.97, 110.57, 119.38, 127.34, 128.53, 147.48, 174.46, 216.65. Anal. Calcd. for C<sub>18</sub>H<sub>18</sub>O<sub>8</sub> C, C, 59.67; H, 5.01; Found: C, C, 59.71; H, 5.21.

## 2.4. $^1\text{H}$ and $^{13}\text{C}$ NMR spectra

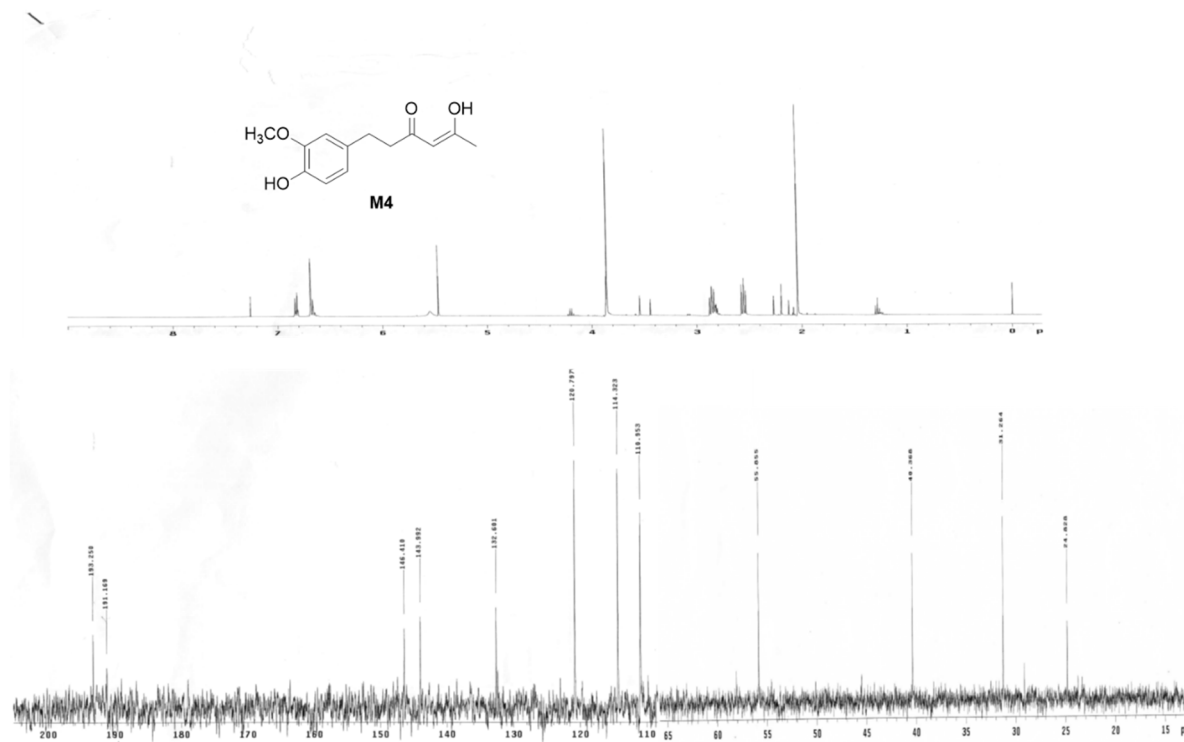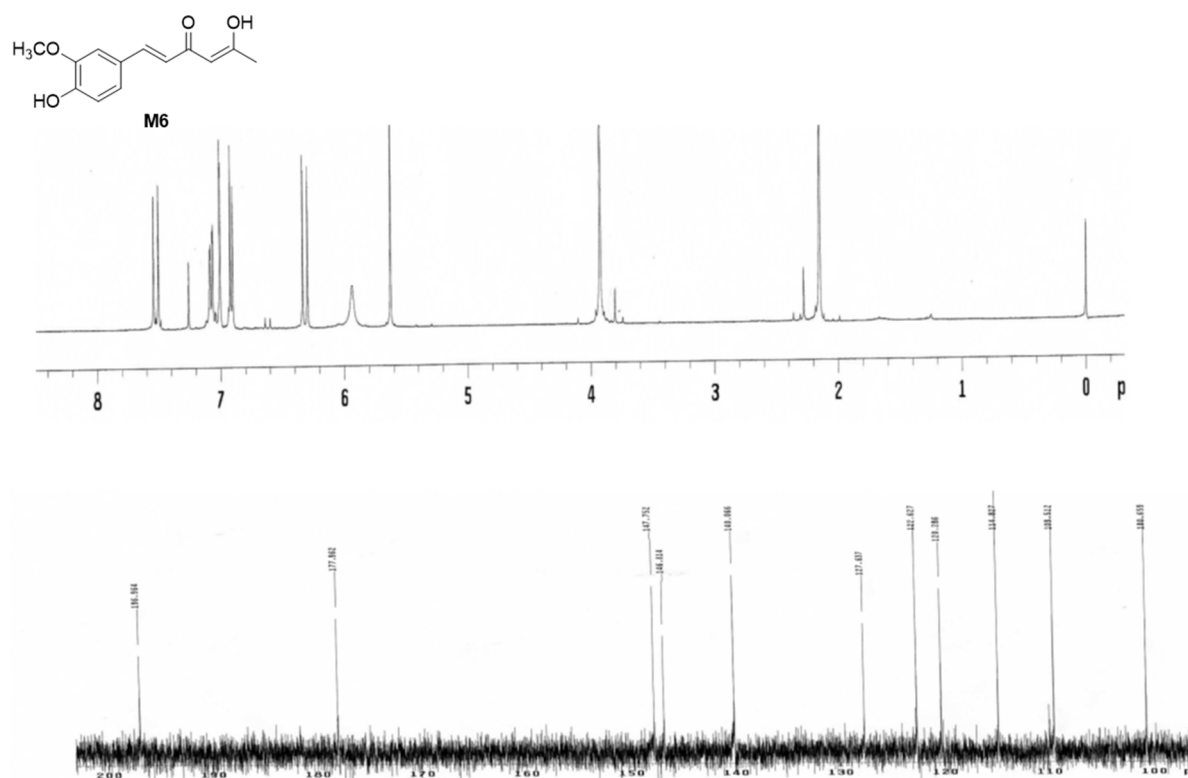

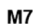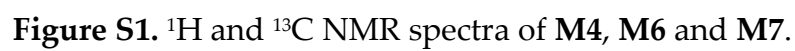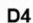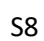

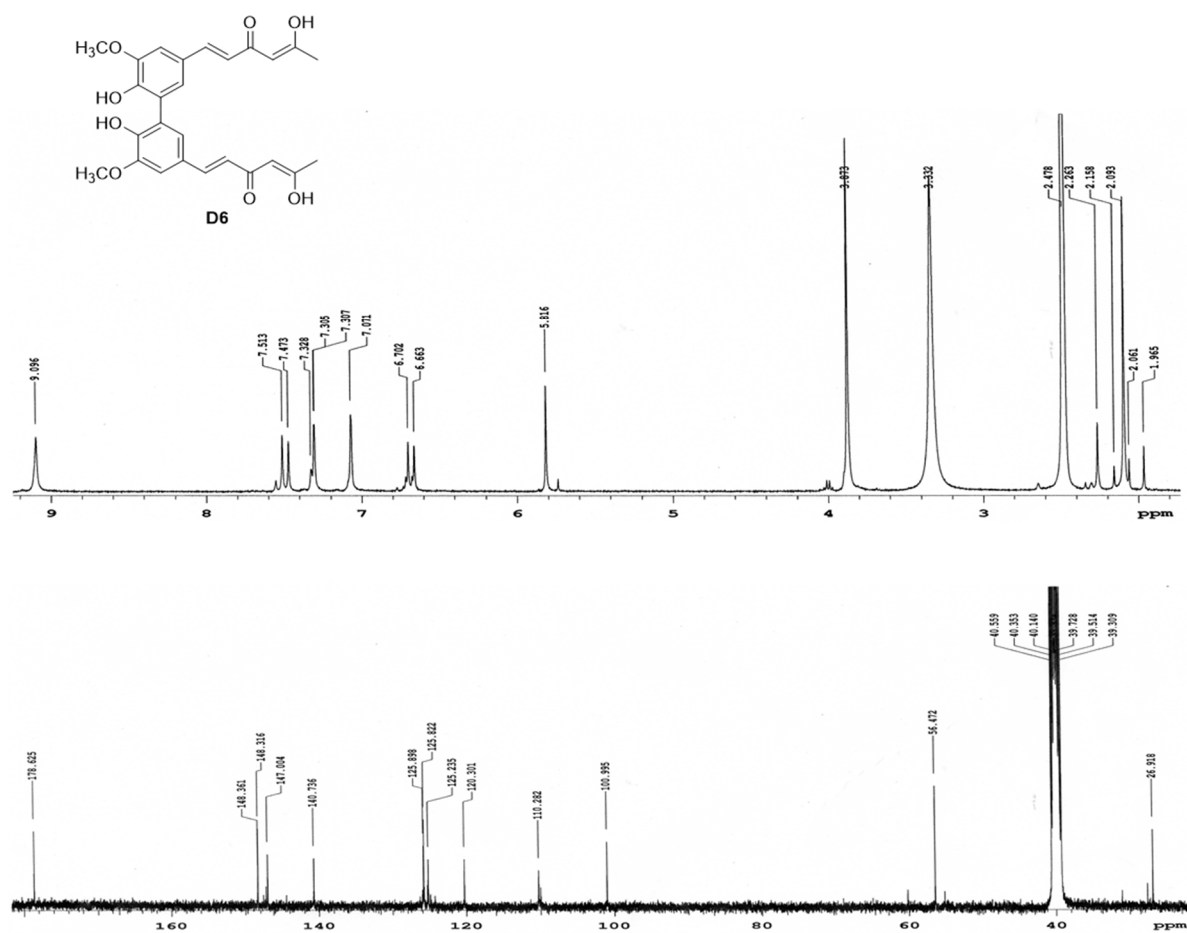

**Figure S2.** <sup>1</sup>H and <sup>13</sup>C NMR spectra of **D4** and **D6**.

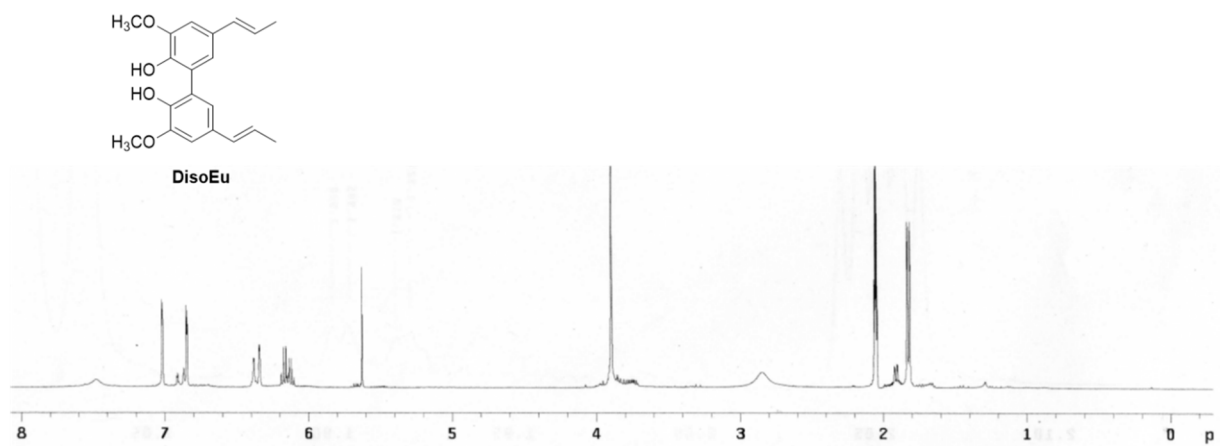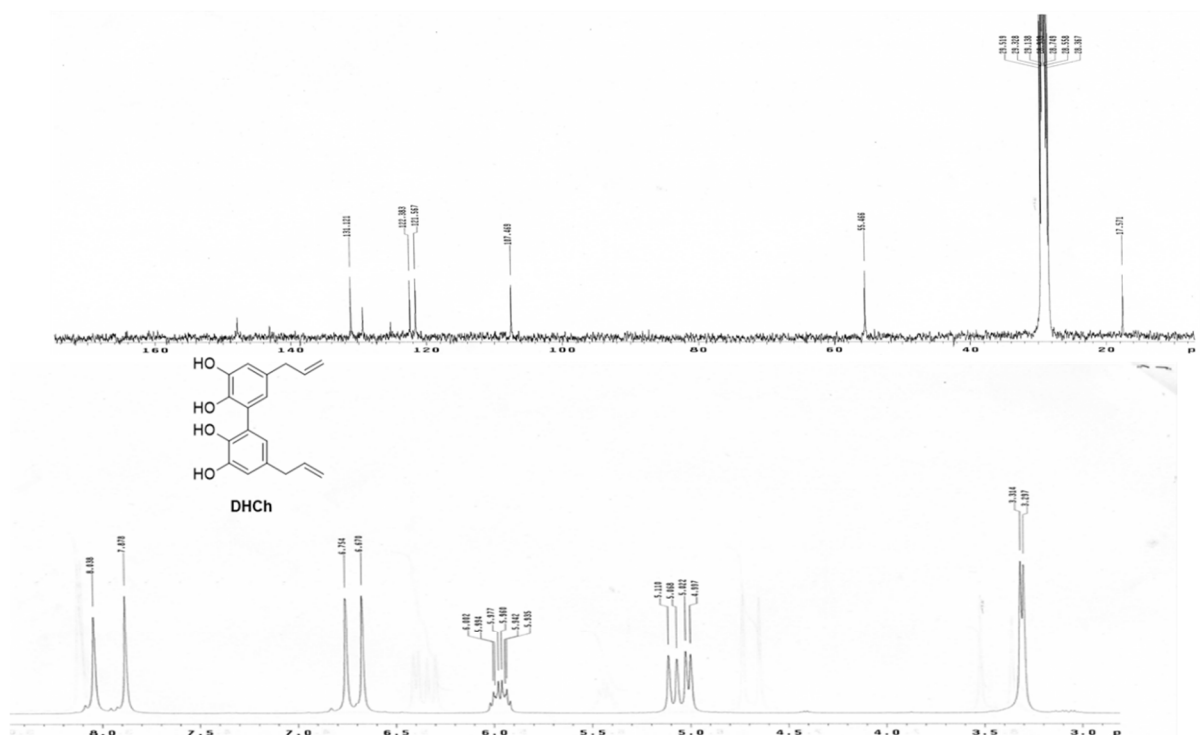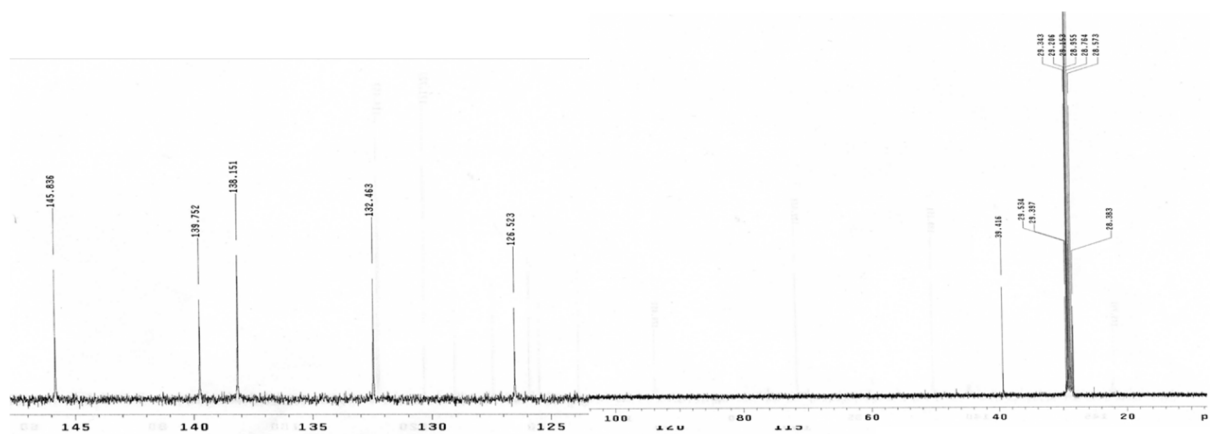

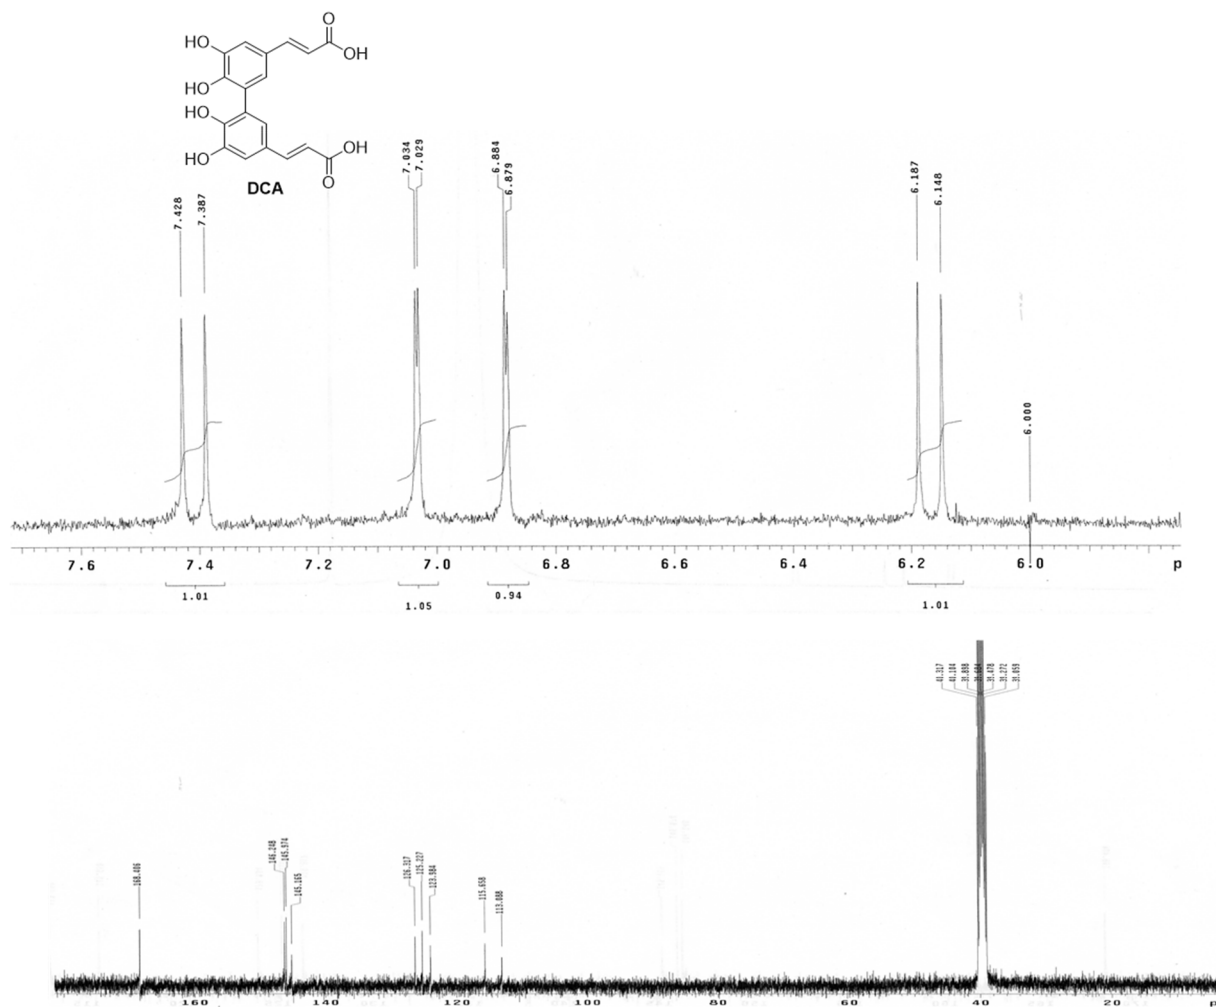

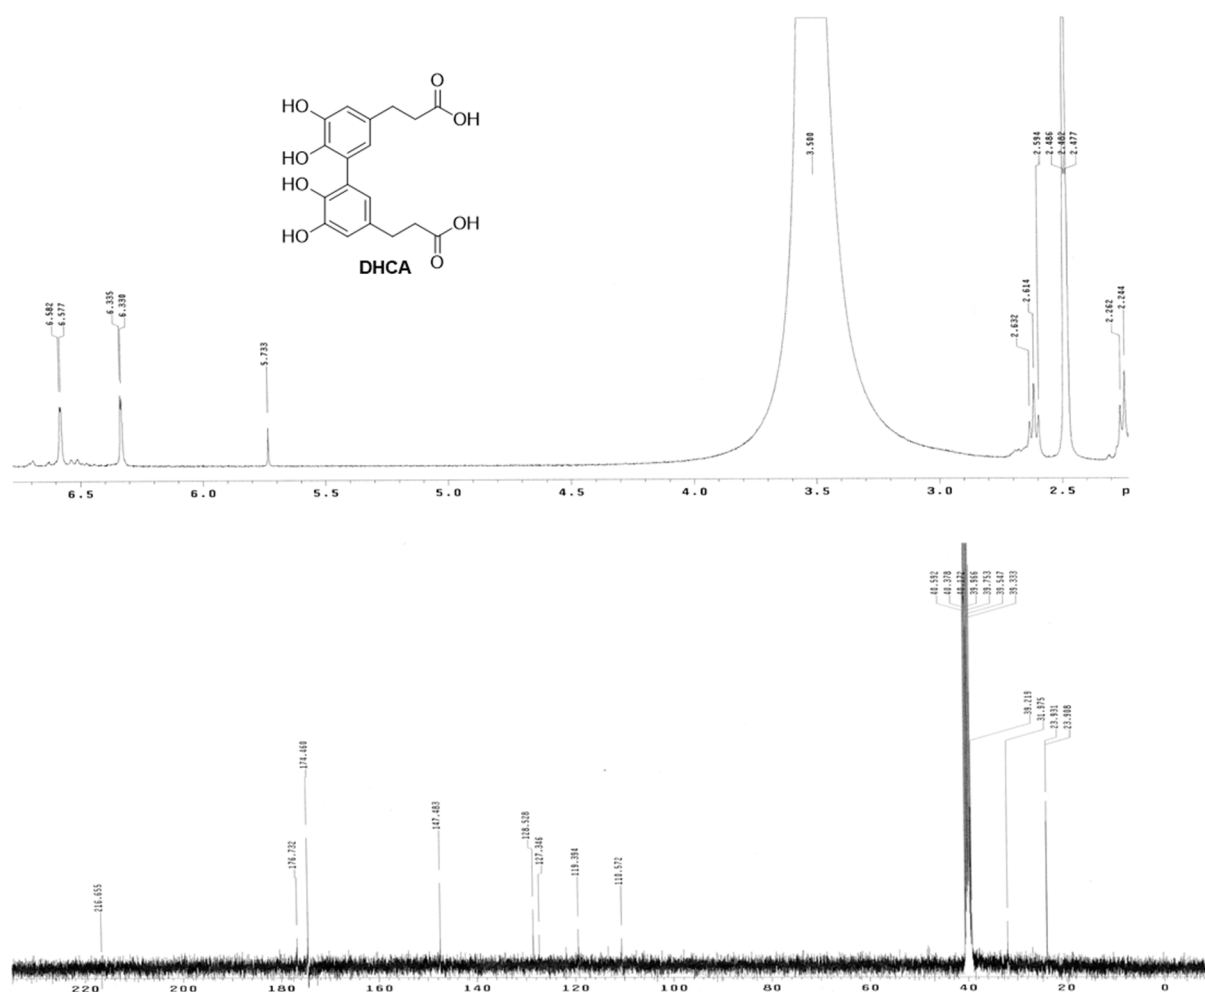

**Figure S3.**  $^1\text{H}$  and  $^{13}\text{C}$  NMR spectra of **DisoEu**, **DHCh**, **DCA** and **DHCA**.

### 3. Lipid autoxidation

### 3.1. Lipid sample

Triacylglycerols of commercially available sunflower oil (TGSO) were cleaned from pro- and antioxidants by adsorption chromatography [3] and stored under nitrogen atmosphere at minus 20 °C. Fatty acid composition of the lipid substrate was determined according to Christie [4] by GC analysis of the methyl esters of the total fatty acids obtained with a GC-FID Hewlett-Packard 5890 equipment (Hewlett-Packard GmbH, Austria) and a capillary column HP INNOWAX (polyethylene glycol mobile phase, Agilent Technologies, USA) 30 m × 0.25 mm × 0.25 mm. The temperature gradient started from 165°C increased to 230 °C with 4°C/min and was held at this temperature for 15 min; injection volume was 1 µl. Injector and detector temperatures were 260 and 280 °C, respectively. Nitrogen was the carrier gas at a flow rate of 0.8 ml/min.

Lipid samples containing various inhibitors were prepared directly before use. Aliquots of the antioxidant solutions in acetone were added to the lipid sample. Solvents were removed under a nitrogen flow.

### 3.2. Lipid autoxidation

The process was carried out in a thermostatic bath at 80 °C ( $\pm 0.2$  °C) by blowing air through the samples in special vessels and was monitored by withdrawing samples at measured time intervals and subjecting them to iodometric determination of the primary products (lipid hydroperoxides, LOOH) concentration, i.e. the peroxide value (PV) [5],[6]. All kinetic data are expressed as the average of two independent measurements.

TGSO is a mixture of different types of fatty acids glycerol esters, but only those fatty acids with pentadiene structures are vulnerable to oxidation by atmospheric oxygen. Phenolic antioxidants inhibit or retard lipid oxidation by interfering with either chain propagation or initiation by readily donating hydrogen atoms to lipid peroxy radicals.

#### Scheme S1. Basic scheme of lipid (LH) autoxidation

|                                                                                                                                           |                                                                                                                       |                      |
|-------------------------------------------------------------------------------------------------------------------------------------------|-----------------------------------------------------------------------------------------------------------------------|----------------------|
| <i>Non-inhibited lipid (LH) autoxidation (in absence of an antioxidant)</i>                                                               |                                                                                                                       |                      |
| Chain generation                                                                                                                          | $2\text{LH} + \text{O}_2 \rightarrow \delta \text{LO}_2^\bullet$                                                      | ( $R_{\text{IN}}$ )  |
| Chain propagation                                                                                                                         | $\text{LO}_2^\bullet + \text{LH} (+\text{O}_2) \rightarrow \text{LOOH} + \text{LO}_2^\bullet$                         | ( $k_p$ )            |
| Chain termination                                                                                                                         | $\text{LO}_2^\bullet + \text{LO}_2^\bullet \rightarrow \text{P}$                                                      | ( $2k_t$ )           |
| Chain branching 1                                                                                                                         | $\text{LOOH} (+\text{O}_2) \rightarrow \delta_1 \text{LO}_2^\bullet + \text{P}_1$                                     | ( $k_{b1}$ )         |
| Chain branching 2                                                                                                                         | $\text{LOOH} + \text{LH} (+\text{O}_2) \rightarrow \delta_2 \text{LO}_2^\bullet + \text{P}_2$                         | ( $k_{b2}$ )         |
| Chain branching 3                                                                                                                         | $\text{LOOH} + \text{LOOH} (+\text{O}_2) \rightarrow \delta_3 \text{LO}_2^\bullet + \text{P}_3$                       | ( $k_{b3}$ )         |
| <i>Inhibiting reactions, responsible to the antioxidant activity of monomers <math>\text{M}_i\text{OH}</math></i>                         |                                                                                                                       |                      |
| Chain termination with H atom transfer reaction                                                                                           | $\text{LO}_2^\bullet + \text{M}_i\text{OH} \rightarrow \text{LOOH} + \text{M}_i\text{O}^\bullet$                      | ( $k_{\text{Am}}$ )  |
| Chain termination with_cross-recombination                                                                                                | $\text{LO}_2^\bullet + \text{M}_i\text{O}^\bullet \rightarrow \text{inactive products}$                               | ( $k'_{\text{Am}}$ ) |
| Chain termination with_homo-recombination                                                                                                 | $2\text{M}_i\text{O}^\bullet \rightarrow \text{inactive products}$                                                    | ( $k_{\text{tMO}}$ ) |
| <i>Side reactions of <math>\text{M}_i\text{O}^\bullet</math>, decreasing the antioxidant activity of <math>\text{M}_i\text{OH}</math></i> |                                                                                                                       |                      |
| Reverse inhibition reaction                                                                                                               | $\text{M}_i\text{O}^\bullet + \text{LOOH} \rightarrow \text{LO}_2^\bullet + \text{M}_i\text{OH}$                      | ( $k_{-\text{Am}}$ ) |
| Additional propagation reaction                                                                                                           | $\text{M}_i\text{O}^\bullet + \text{LH} (+\text{O}_2) \rightarrow \delta_3 \text{LO}_2^\bullet + \text{M}_i\text{OH}$ | ( $k_{\text{pMO}}$ ) |
| Quinoidal peroxides (QP) formation                                                                                                        | $2\text{M}_i\text{O}^\bullet + \text{O}_2 \rightarrow \text{QP}$                                                      | ( $k_{\text{QP}}$ )  |
| Quinoidal peroxides (QP) decomposition                                                                                                    | $\text{QP} (+\text{LH}, +\text{O}_2) \rightarrow \delta_4 \text{LO}_2^\bullet + \text{P}_4$                           | ( $k'_{\text{QP}}$ ) |

In this mechanism: LH is linoleic acid with its allylic hydrogen;  $\text{M}_i\text{OH}$  - the studied monomeric *ortho*-methoxyphenol;  $\text{LO}_2^\bullet$  - lipid peroxide radicals;  $\text{M}_i\text{O}^\bullet$  - phenoxyl radicals; P,  $\text{P}_A$ ,  $\text{P}_1$ — $\text{P}_4$  – corresponding products formed; QP- quidoinal peroxides;  $R_{\text{IN}}$  - the rate of initiation;  $k_p$ ,  $k_t$ ,  $k_b$ ,  $k_{\text{Am}}$ ,  $k'_{\text{Am}}$ ,  $k_{\text{tMO}}$ ,  $k_{\text{pMO}}$ ,  $k_{\text{QP}}$  – corresponding rate constants of different reactions.

In the presence of an antioxidant, the rate of hydroperoxides formation is related to the ratio of the lipid [LH] concentration to that of the antioxidant [ $\text{M}_i\text{OH}$ ] concentration.

The classical rate laws for both uninhibited ( $R_c$ ) and inhibited ( $R_A$ ) lipid autoxidation, assuming the long chain approximation, are given by Eqs 1 and 2:

$$\text{Rate of non-inhibited oxidation (} R_c \text{)} \quad R_c = k_p [LH] (R_{IN}/k_t)^{0.5} \quad (1)$$

$$\text{Rate of inhibited oxidation (} R_{Am} \text{)} \quad R_{Am} = k_p [LH] R_{IN} / n k_{Am} [M_i(OH)]_0 \quad (2)$$

*Inhibiting reactions, responsible to the antioxidant activity of the dimer  $D_i(OH)_2$*

Chain termination with H-atom transfer reaction:

$D_i(OH)_2 + LO_2^\bullet \rightarrow D_i(OH)O^\bullet + LOOH$  ( $k_{Ad}$ ) – the key reaction of inhibited lipid autoxidation

$D_i(OH)O^\bullet + LO_2^\bullet \rightarrow D_i(O^\bullet)_2 + LOOH$  ( $k'_{Ad}$ ) [ $D_i(O^\bullet)_2$  – biradical of  $D_i(OH)_2$ ; active intermediate]

Chain termination with cross recombination reaction:

$D_i(OH)O^\bullet + LO_2^\bullet \rightarrow D_i(OH)OL + O_2$  (active intermediate with one free OH group)

$D_i(O^\bullet)_2 + 2LO_2^\bullet \rightarrow$  inactive products ( $k''_{Ad}$ )

Chain termination with homo recombination reaction:

$2 D_i(OH)O^\bullet \rightarrow [D_i(OH)O]_2$  - active intermediate with 2 free OH groups

Additional chain termination with H atom transfer reaction:

$D_i(OH)OL + LO_2^\bullet \rightarrow LOOH + D_i(O^\bullet)OL$  - active intermediate

$[D_i(OH)O]_2 + 2LO_2^\bullet \rightarrow 2LOOH +$  inactive products

Additional cross-recombination reaction:

$D_i(O^\bullet)OL + LO_2^\bullet \rightarrow$  inactive product

Additional homo-recombination reaction:

$2 D_i(O^\bullet)OL \rightarrow$  inactive product

*Inhibited autoxidation - in presence of a biphenolic antioxidant  $Q(OH)_2$*

|                                                        |                                                            |               |
|--------------------------------------------------------|------------------------------------------------------------|---------------|
| Termination (HAT) key reaction<br>( $k_{Aq}$ )         | $LO_2^\bullet + Q(OH)_2 \rightarrow LOOH + Q(OH)O^\bullet$ |               |
| Termination (Cross-dissproportionation)                | $LO_2^\bullet + Q(OH)O^\bullet \rightarrow LOOH + Q(O)_2$  | ( $k'_{Aq}$ ) |
| Termination (Homo-recombination)                       | $2Q(OH)O^\bullet \rightarrow$ Dimers                       | ( $k_{Rq}$ )  |
| Termination (Homo-dissproportionation)<br>( $k_{Dq}$ ) | $Q(OH)O^\bullet \rightarrow Q(OH)_2 + Q(O)_2$              |               |

**Scheme S2.** Basic kinetic scheme of uninhibited and inhibited (in presence of monomers and dimers) lipid autoxidation.

$$\text{Rate of inhibited oxidation (} R_{Ad} \text{):} \quad R_{Ad} = k_p [LH] R_{IN} / n k_{Ad} [D_i(OH)_2]_0 \quad (3)$$

In Eqs 3-5:  $k_p/(2k_t)^{0.5}$  is the oxidizability of the lipid substrate (linoleic acid glycerol ester);  $n$ - is the number of radicals trapped per inhibitor for molecule (the stoichiometric factor).

### 3.3.Determination of the main kinetic parameters of the studied compounds

*Antioxidant efficiency* means the potency of an antioxidant to increase the persistence towards oxidation of a lipid substrate by blocking the radical-chain

process. It was presented with a protection factor (PF) meaning how many times the antioxidant increases the persistence against oxidation of the lipid sample, determined as a ratio between the induction periods in presence (IP or IP<sub>A</sub>) and in absence (IP<sub>C</sub>) of an antioxidant, i.e. PF = IP<sub>Am</sub>/IP<sub>C</sub> for the monomers and PF = IP<sub>Ad</sub>/IP<sub>C</sub> for the dimers.

*Inhibition degree* (ID) is a measure of the antioxidant reactivity, which manifests how many times the antioxidant shortens the oxidation chain length, i.e. ID = R<sub>C</sub>/R<sub>Am</sub> in the case of monomers and ID = R<sub>C</sub>/R<sub>Ad</sub> in the case of dimers. For that reason, it is one of the most important kinetic parameters. Initial rates of lipid autooxidation in the absence (R<sub>C</sub>) and in the presence of the antioxidant (R<sub>Am</sub> or R<sub>Ad</sub>) were found from the tangent at the initial phase of the kinetic curves of hydroperoxides accumulation.

|                                                                           |                                                                                                           |
|---------------------------------------------------------------------------|-----------------------------------------------------------------------------------------------------------|
| Chain length of non-inhibited oxidation (v <sub>0</sub> )                 | v <sub>c</sub> = R <sub>C</sub> /R <sub>IN</sub>                                                          |
| Chain length of inhibited oxidation (v <sub>Am</sub> or v <sub>Ad</sub> ) | v <sub>Am</sub> = R <sub>Am</sub> /R <sub>IN</sub> and v <sub>Ad</sub> = R <sub>Ad</sub> /R <sub>IN</sub> |
| <i>Inhibition degree (ID)</i>                                             |                                                                                                           |
| <i>In case of monomers</i>                                                | ID = R <sub>C</sub> /R <sub>Am</sub> = v <sub>c</sub> /v <sub>Am</sub>                                    |
| <i>In case of dimers</i>                                                  | ID = R <sub>C</sub> /R <sub>Ad</sub> = v <sub>c</sub> /v <sub>Ad</sub>                                    |

#### 4. Estimation of rate constant of antioxidant reaction with peroxy radicals (k<sub>A</sub>) using kinetic chemiluminescence (CL) method

|                                                                                     |                      |                     |
|-------------------------------------------------------------------------------------|----------------------|---------------------|
| Y → 2Y•                                                                             | (R <sub>IN</sub> )   |                     |
| Y• + O <sub>2</sub> → YO <sub>2</sub> •                                             |                      |                     |
| YO <sub>2</sub> • + RH → YOOH + R•                                                  |                      |                     |
| R• + O <sub>2</sub> → RO <sub>2</sub> •                                             |                      |                     |
| RO <sub>2</sub> • + RH → ROOH + R•                                                  | (k <sub>p</sub> )    |                     |
| 2RO <sub>2</sub> • → R=O* + ROH + O <sub>2</sub>                                    | (2k <sub>t</sub> )   |                     |
| RO <sub>2</sub> • + M <sub>i</sub> OH → ROOH + M <sub>i</sub> O•                    | (k <sub>Am</sub> )   | in case of monomers |
| RO <sub>2</sub> • + M <sub>i</sub> O• → inactive products                           | (k' <sub>Am</sub> )  |                     |
| RO <sub>2</sub> • + D <sub>i</sub> (OH) <sub>2</sub> → ROOH + D <sub>i</sub> (O•)OH | (k <sub>Ad</sub> )   | in case of dimers   |
| RO <sub>2</sub> • + D <sub>i</sub> (O•)OH → ROOH + D <sub>i</sub> (O•) <sub>2</sub> | (k' <sub>Ad</sub> )  |                     |
| 2RO <sub>2</sub> • + D <sub>i</sub> (O•) <sub>2</sub> → inactive products           | (k'' <sub>Ad</sub> ) |                     |

**Scheme S3.** Basic kinetic scheme of initiated oxidation of ethylbenzene (RH) in CL, in absence and in presence of studied compounds.

The CL assay for antioxidant activity is based on the competition between the self reaction of peroxy radicals (reaction step “k<sub>t</sub>” in Scheme S2), giving rise to light emission, and scavenging the peroxy radicals by antioxidants (MOH), thus inhibiting the oxidation and thereby quenching the chemiluminescence [7]. The kinetic analysis of the reaction sequence (Scheme S3) affords convenient expressions relating the time profile of the chemiluminescence signal with the pertinent characteristics of an antioxidant being studied. The *strength* of an antioxidant is quantified by the rate constant k<sub>A</sub>, whose value may be acquired from the slope of the chemiluminescence

time profile at the inflection point according to equation 4 [7] in which  $i_{\text{rel}}$  is a dimensionless light intensity given by the

$$(di_{\text{rel}}/dt)_{\text{max}} = 0.237(k_A/(2k_t)^{0.5})R_{\text{IN}} \quad (4)$$

ratio of the intensities in the presence ( $I$ ) and in the absence ( $I_0$ ) of an antioxidant,  $i_{\text{rel}} = I/I_0$ . It should be stressed that the consumption of an antioxidant in the chemiluminescence sample solution after the induction period results in recovery of the light-emission intensity,  $I_\infty$ , i.e.,  $I_\infty = I_0$  and  $i_{\text{rel}} = I/I_0 = I/I_\infty$ , and  $R_{\text{IN}}$  stays for the reaction initiation rate defined by equation 5. In the latter expression,  $k_{\text{dec}}$  is the rate constant of the initiator (Y) decomposition

$$R_{\text{IN}} = 2\gamma_c k_{\text{dec}}[Y] \quad (5)$$

to generate initiating radicals ( $Y^\bullet$  in Scheme S3) and  $\gamma_c$  is their probability to escape the solvent cage. The  $2\gamma_c k_{\text{dec}}$  data are available for most of “standard” initiators (such as AIBN, for instance) in a number of organic solvents and in a temperature range of 20 to 80 °C. The  $2\gamma_c k_{\text{dec}}$  data are available for most of “standard” initiators (such as AIBN, for instance) in a number of organic solvents and in a temperature range of 20 to 80 °C. Calculation of  $k_A$  from Eq. 4. was made taking into account that the  $2k_t$  value obtained experimentally at the same conditions (chemiluminescence of ethylenbenzene) and temperature of 50 °C is equal to  $2k_t = (1.90 \pm 0.05) 10^7 \text{ M}^{-1}\text{s}^{-1}$  [7].

**Table S2.** Effect of the 10-fold higher concentration of the studied antioxidants (0.1 mM and 1.0 mM). For monomers (M)  $\text{PF}^{\text{M}_{10}} = \text{PF}_1/\text{PF}_{0.1}$  and  $\text{ID}^{\text{M}_{10}} = \text{PF}_1/\text{PF}_{0.1}$ , for dimers (D)  $\text{PF}^{\text{D}_{10}} = \text{PF}_1/\text{PF}_{0.1}$  and  $\text{ID}^{\text{D}_{10}} = \text{ID}_1/\text{PF}_{0.1}$

| Monomer       | $\text{PF}^{\text{M}_{10}}$ | $\text{ID}^{\text{M}_{10}}$ | $\text{PF}^{\text{D}_{10}}$ | $\text{ID}^{\text{D}_{10}}$ | Dimer         |
|---------------|-----------------------------|-----------------------------|-----------------------------|-----------------------------|---------------|
| <b>Cr</b>     | 1.3                         | 1.1                         | 1.4                         | 1.5                         | <b>DCr</b>    |
| <b>Va</b>     | 1.2                         | 1.0                         | n.s.                        | n.s.                        | <b>DVa</b>    |
| <b>Apo</b>    | 1.2                         | 1.3                         | n.s.                        | n.s.                        | <b>DApo</b>   |
| <b>Eu</b>     | 1.3                         | 1.2                         | n.s.                        | n.s.                        | <b>DEu</b>    |
| <b>iso-Eu</b> | 1.8                         | 1.3                         | n.d.                        | n.d.                        | <b>DisoEu</b> |
| <b>FA</b>     | 1.6                         | 2.8                         | 1.8                         | 2.3                         | <b>DFA</b>    |
| <b>HFA</b>    | 1.6                         | 2.8                         | 1.7                         | 2.9                         | <b>DHFA</b>   |
| <b>M1</b>     | 3.5                         | 6.3                         | 5.2                         | 13.9                        | <b>D1</b>     |
| <b>M2</b>     | 3.2                         | 5.5                         | 3.6                         | 5.5                         | <b>D2</b>     |
| <b>M3</b>     | 3.0                         | 3.2                         | 4.4                         | 3.5                         | <b>D3</b>     |
| <b>M4</b>     | 2.0                         | 4.0                         | 3.0                         | 5.0                         | <b>D4</b>     |
| <b>M5</b>     | 3.0                         | 2.2                         | 3.0                         | 3.7                         | <b>D5</b>     |
| <b>M6</b>     | n.d.                        | n.d.                        | n.d.                        | n.d.                        | <b>D6</b>     |
| <b>M7</b>     | n.d.                        | n.d.                        |                             |                             |               |
| <b>M8</b>     | 2.9                         | 4.7                         | 4.1                         | 3.0                         | <b>D8</b>     |
| <b>M9</b>     | 2.2                         | 3.4                         | 4.1                         | 5.4                         | <b>D9</b>     |

|                 |     |     |   |   |   |
|-----------------|-----|-----|---|---|---|
| <b>Curcumin</b> | 4.5 | 6.7 | - | - | - |
|-----------------|-----|-----|---|---|---|

n.d. – not determined, n.s. not soluble in lipid substrate.

M6, M7, D6, D7, DisoEu were studied only by theoretical methods.

**Table S3.** Effect of biphenyl structure.

| Dimer/Monomer  |  | Conc.<br>mM | PF <sub>D/M</sub> | ID <sub>D/M</sub> |
|----------------|--|-------------|-------------------|-------------------|
| <b>D1/M1</b>   |  | 0.1         | 2.6               | 2.9               |
|                |  | 1.0         | 3.9               | 4.6               |
| <b>D2/M2</b>   |  | 0.1         | 1.5               | 1.6               |
|                |  | 1.0         | 1.7               | 1.6               |
| <b>D3/M3</b>   |  | 0.1         | 1.5               | 1.0               |
|                |  | 1.0         | 3.7               | 1.1               |
| <b>D4/M4</b>   |  | 0.1         | 1.1               | 1.0               |
|                |  | 1.0         | 1.7               | 1.2               |
| <b>D5/M5</b>   |  | 0.1         | 1.0               | 2.4               |
|                |  | 1.0         | 1.0               | 1.4               |
| <b>D8/M8</b>   |  | 0.1         | 1.0               | 0.7               |
|                |  | 1.0         | 1.3               | 0.7               |
| <b>D9/M9</b>   |  | 0.1         | 1.0               | 0.7               |
|                |  | 1.0         | 1.6               | 1.1               |
| <b>DFA/FA</b>  |  | 0.1         | 1.0               | 1.0               |
|                |  | 1.0         | 1.0               | 1.0               |
| <b>DCr/Cr</b>  |  | 0.1         | 0.9               | 0.6               |
|                |  | 1.0         | 2.0               | 1.0               |
| <b>Curc/M1</b> |  | 0.1         | 1.6               | 4.4               |
|                |  | 1.0         | 3.9               | 4.7               |
| <b>Curc/M3</b> |  | 0.1         | 1.6               | 1.4               |
|                |  | 1.0         | 2.4               | 3.0               |

## 5. DFT computational studies

**Table S4.** B3LYP/6-31+G(d,p) gas phase calculated enthalpies  $H_{298}$  (a.u.) and dihedral angles ( $^{\circ}$ ) for AO structures shown in Figure 1A-C and respective radicals (AO $\bullet$ ). BDEs (kcal mol $^{-1}$ ) are derived from  $H_{298}$  values calculated for neutral (AO) and radical (AO $\bullet$ , H $\bullet$ ) species.

| Compound        | $H_{298}$ (AO) | $H_{298}$ (AO $\bullet$ ) | BDE  | $\theta^{\circ}$<br>(AO) | $\theta^{\circ}$<br>(AO $\bullet$ ) | Also<br>mentioned in: |
|-----------------|----------------|---------------------------|------|--------------------------|-------------------------------------|-----------------------|
| <b>Curcumin</b> | -1263.272328   | -1262.646509              | 78.8 |                          |                                     | [8]                   |

|               |              |              |      |      |      |           |
|---------------|--------------|--------------|------|------|------|-----------|
|               |              |              |      |      |      |           |
| <b>Cr</b>     | -461.169138  | -460.541707  | 79.8 |      |      | [9]       |
| <b>Va</b>     | -535.200734  | -534.567085  | 83.7 |      |      | [9]       |
| <b>Apo</b>    | -574.496592  | -573.863718  | 83.2 |      |      | [9]       |
| <b>Eu</b>     | -538.531135  | -537.903146  | 80.1 |      |      | [9]       |
| <b>isoEu</b>  | -538.541134  | -537.917493  | 77.4 |      |      | [9]       |
| <b>FA</b>     | -687.821912  | -687.193184  | 80.6 |      |      | [10]      |
| <b>M1</b>     | -1302.554493 | -1301.928076 | 79.2 |      |      | [10]      |
| <b>M3</b>     | -1032.317391 | -1031.689946 | 79.8 |      |      |           |
| <b>M6</b>     | -804.486573  | -803.859376  | 79.6 |      |      |           |
| <b>M7</b>     | -843.773289  | -843.146109  | 79.9 |      |      |           |
| <b>M2</b>     | -653.066142  | -652.438022  | 80.2 |      |      | [10]      |
| <b>HFA</b>    | -689.020063  | -688.391341  | 80.6 |      |      |           |
| <b>M4</b>     | -805.682054  | -805.054012  | 80.2 |      |      |           |
| <b>M5</b>     | -997.374041  | -996.745838  | 80.3 |      |      |           |
| <b>M8</b>     | -1036.666595 | -1036.038505 | 80.2 |      |      | [11]      |
| <b>M9</b>     | -1154.525497 | -1153.897424 | 80.2 |      |      | [11]      |
| <b>HCh</b>    | -499.257728  | -498.641117  | 73.0 |      |      |           |
| <b>HPH</b>    | -612.594197  | -611.975469  | 74.3 |      |      |           |
| <b>CA</b>     | -648.548130  | -647.928078  | 75.2 |      |      | [12]      |
| <b>HCA</b>    | -649.745959  | -649.129776  | 72.7 |      |      |           |
|               |              |              |      |      |      |           |
| <b>DCr</b>    | -921.154915  | -920.528642  | 79.1 | 62.9 | 61.1 | [9]       |
| <b>DVa</b>    | -1069.218727 | -1068.586389 | 82.9 | 62.7 | 59.5 | [9]       |
| <b>DApo</b>   | -1147.810582 | -1147.178797 | 82.5 | 63.0 | 60.4 | [9]       |
| <b>DEu</b>    | -1075.878884 | -1075.252057 | 79.4 | 63.0 | 61.1 | [9]       |
| <b>DisoEu</b> | -1075.899195 | -1075.276325 | 76.9 | 63.5 | 62.9 | [9]       |
| <b>DFa</b>    | -1374.461072 | -1373.833542 | 79.9 | 63.1 | 60.3 | [10],[12] |
| <b>D1</b>     | -1302.554462 | -1301.928383 | 78.9 | 63.6 | 60.5 | [10],[12] |
| <b>D3</b>     | -2063.452014 | -2062.825554 | 79.2 | 63.0 | 61.7 |           |
| <b>D6</b>     | -1607.790268 | -1607.164203 | 78.9 | 63.0 | 60.6 |           |
| <b>D7</b>     | -1686.363704 | -1685.737657 | 78.9 | 62.8 | 60.6 |           |
| <b>D2</b>     | -1304.948860 | -1304.321729 | 79.6 | 62.2 | 59.7 | [10]      |
| <b>DHFA</b>   | -1376.853281 | -1376.225057 | 80.3 | 63.6 | 60.6 |           |
| <b>D4</b>     | -1610.180433 | -1609.553451 | 79.5 | 63.9 | 60.5 |           |
| <b>D5</b>     | -1993.565020 | -1992.938034 | 79.5 | 63.1 | 61.9 |           |
| <b>D8</b>     | -2072.150177 | -2071.523306 | 79.4 | 62.3 | 60.9 | [11]      |
| <b>D9</b>     | -2307.867988 | -2307.867988 | 79.6 | 63.2 | 61.5 | [11]      |
| <b>DHCh</b>   | -997.331996  | -996.716674  | 72.2 | 62.8 | 61.3 |           |
| <b>DHPH</b>   | -1224.005687 | -1223.387443 | 74.0 | 63.2 | 62.0 |           |
| <b>DCA</b>    | -1295.913311 | -1295.293777 | 74.8 | 62.5 | 60.8 |           |
| <b>DHCA</b>   | -1298.307686 | -1297.691985 | 72.4 | 62.6 | 61.1 |           |

## References

- [1] Feng J-Y, Liu Z-Q. Feruloylacetone as the model compound of half-curcumin: synthesis and antioxidant properties. *Eur J Med Chem* 2011;46:1198–206. <https://doi.org/10.1016/j.ejmech.2011.01.039>.
- [2] Typek R, Dawidowicz AL, Bernacik K, Stankevič M. Feruloyloacetone can be the main curcumin transformation product. *Food Chem* 2019;286:136–40. <https://doi.org/10.1016/j.foodchem.2019.01.194>.
- [3] Popov, A.; Yanishlieva N. S., *J Compt Rend Acad Bulg Sci* 1968;21:443–6.
- [4] Christie WW, Han X. *Lipid Analysis*. 4th ed. Woodhead Publishing; 2012.
- [5] Yanishlieva, N. V.; Popov, A. D.; Marinova E. M., *Compt Rend Acad Bulg Sci* 1978;31:869–71.
- [6] Kancheva VD. Phenolic antioxidants – radical-scavenging and chain-breaking activity: A comparative study. *Eur J Lipid Sci Technol* 2009;111:1072–89. <https://doi.org/10.1002/ejlt.200900005>.
- [7] Fedorova GF, Menshov VA, Trofimov A V, Vasil'ev RF. Facile chemiluminescence assay for antioxidative properties of vegetable lipids: fundamentals and illustrative examples. *Analyst* 2009;134:2128–34. <https://doi.org/10.1039/B905059K>.
- [8] Slavova-Kazakova AK, Angelova SE, Veprintsev TL, Denev P, Fabbri D, Dettori MA, et al. Antioxidant potential of curcumin-related compounds studied by chemiluminescence kinetics, chain-breaking efficiencies, scavenging activity (ORAC) and DFT calculations. *Beilstein J Org Chem* 2015;11. <https://doi.org/10.3762/bjoc.11.151>.
- [9] Koleva, L.; Angelova, S.; Dettori, M. A.; Fabbri, D.; Delogu, G.; Kancheva VD. Antioxidant activity of selected o-Antioxidant activity of selected o-methoxyphenols and biphenols: theoretical and experimental studies. *Bulg Chem Comm* 2018;50:238–46.
- [10] Kancheva, V. D.; Slavova-Kazakova, A.; Fabbri, F.; Angelova, S.; Dettori, M. A.; Jordan Nechev, Delogu, G., Antiradical and Antioxidant Activities of New Natural-like Hydroxylated Biphenyls of Dehydrozingerone, Zingerone and Ferulic Acid. *Comptes Rendus l'Académie Bulg Des Sci* 2013;66:361–8.
- [11] Slavova-Kazakova A, Angelova S, Fabbri D, Antonietta Dettori M, Kancheva VD, Delogu G. Antioxidant properties of novel curcumin analogues: A combined experimental and computational study. *J Food Biochem* 2021;45:e13584. <https://doi.org/10.1111/jfbc.13584>.

- [12] Kancheva VD., Angelova SE. Synergistic Effects of Antioxidant Compositions during Inhibited Lipid Autoxidation. LIPID PEROXIDATION INHIBITION , EFFECTS AND MECHANISMS (ed.: Catala, A.), Nova Science Publishers, Inc., New York, 2016.
