# Supplementary material for: Natural Chain-Breaking Antioxidants and Their Synthetic Analogs as Modulators of Oxidative Stress
Source: Antioxidants (Basel). 2021 Apr 19;10(4):624. doi: 10.3390/antiox10040624 (PMC8074124; doi:10.3390/antiox10040624)
Supplement: Supplementary file 1 [file antioxidants-10-00624-s001.zip › antioxidants-1182777-S2_In silico predictions of ADME-Tox properties-2.xlsx]

## Sheet: Structural information
ID	Trivial name	Group	SMILES
Cr	Creosol	A1	c1(c(ccc(c1)C)O)OC
DCr	Dehydrodicresol	A1	c1(c(c(cc(c1)C)c1cc(cc(c1O)OC)C)O)OC
Va	Vanillin	A1	c1(c(ccc(c1)C=O)O)OC
DVa	Dehydrodivanillin	A1	c1(c(c(cc(c1)C=O)c1cc(cc(c1O)OC)C=O)O)OC
Apo	Apocynin	A1	c1(c(ccc(c1)C(=O)C)O)OC
DApo		A1	c1(c(c(cc(c1)C(=O)C)c1cc(cc(c1O)OC)C(=O)C)O)OC
Eu	Eugenol	A1	c1(c(ccc(c1)CC=C)O)OC
DEu	Dehydrodieugenol	A1	c1(c(c(cc(c1)CC=C)c1cc(cc(c1O)OC)CC=C)O)OC
iso-Eu	iso-Eugenol	A1	C/C=C/c1ccc(c(c1)OC)O
Diso-Eu		A1	COc1cc(\C=C\C)cc(c1O)-c1cc(\C=C\C)cc(OC)c1O
FA	Ferulic acid	A2	c1(c(ccc(c1)/C=C/C(=O)O)O)OC
DFA	Diferulic acid	A2	c1(c(c(cc(c1)/C=C/C(=O)O)c1cc(cc(c1O)OC)/C=C/C(=O)O)O)OC
M1	Vanillidene acetone	A2	c1(c(ccc(c1)/C=C/C(=O)C)O)OC
D1		A2	c1(c(c(cc(c1)/C=C/C(=O)C)c1cc(cc(c1O)OC)/C=C/C(=O)C)O)OC
M6		A2	c1(c(ccc(c1)/C=C/C(=O)/C=C(/C)\O)O)OC
D6		A2	c1(c(c(cc(c1)/C=C/C(=O)/C=C(/C)\O)c1cc(cc(c1O)OC)/C=C/C(=O)/C=C(\O)/C)O)OC
M7		A2	c1(c(ccc(c1)/C=C/C(=O)/C=C(/CC)\O)O)OC
M3		A2	c1(c(ccc(c1)/C=C/C(=O)/C=C(/C(=O)OCC)\O)O)OC
D3		A2	c1(c(c(cc(c1)/C=C/C(=O)/C=C(/C(=O)OCC)\O)c1cc(cc(c1O)OC)/C=C/C(=O)/C=C(/C(=O)OCC)\O)O)OC
Curc	Curcumin	A2	c1(c(ccc(c1)/C=C/C(=O)/C=C(/C=C/c1ccc(c(c1)OC)O)\O)O)OC
HFA	Hydroferulic acid	A3	c1(c(ccc(c1)CCC(=O)O)O)OC
DHFA		A3	c1(c(c(cc(c1)CCC(=O)O)c1cc(cc(c1O)OC)CCC(=O)O)O)OC
M2	Zingerone	A3	c1(c(ccc(c1)CCC(=O)C)O)OC
D2		A3	c1(c(c(cc(c1)CCC(=O)C)c1cc(cc(c1O)OC)CCC(=O)C)O)OC
M4		A3	c1(c(ccc(c1)CCC(=O)/C=C(/C)\O)O)OC
D4		A3	c1(c(c(cc(c1)CCC(=O)/C=C(/C)\O)c1cc(cc(c1O)OC)CCC(=O)/C=C(\O)/C)O)OC
M5		A3	c1(c(ccc(c1)CCC(=O)/C=C(/c1ccccc1)\O)O)OC
D5		A3	c1(c(c(cc(c1)CCC(=O)/C=C(/c1ccccc1)\O)c1cc(cc(c1O)OC)CCC(=O)/C=C(\O)/c1ccccc1)O)OC
M8		A3	Oc1ccc(cc1OC)CCC(=O)/C=C(\O)c1ccc(C)cc1
D8		A3	Oc1c(cc(cc1OC)CCC(=O)/C=C(\O)c1ccc(C)cc1)c1cc(CCC(=O)/C=C(\O)c2ccc(C)cc2)cc(OC)c1O
M9		A3	Oc1ccc(cc1OC)CCC(=O)/C=C(\O)c1ccc(cc1)C(C)(C)C
D9		A3	Oc1c(cc(cc1OC)CCC(=O)/C=C(\O)c1ccc(cc1)C(C)(C)C)c1cc(CCC(=O)/C=C(\O)c2ccc(cc2)C(C)(C)C)cc(OC)c1O
HCh	Hydroxychavicol	B1	c1(c(ccc(c1)CC=C)O)O
DHCh		B1	c1(c(c(cc(c1)CC=C)c1cc(cc(c1O)O)CC=C)O)O
HPh		B2	c1(c(ccc(c1)/C=C/C(=O)C)O)O
DHPh		B2	c1(c(c(cc(c1)/C=C/C(=O)C)c1cc(cc(c1O)O)/C=C/C(=O)C)O)O
CA	Caffeic acid	B2	c1(c(ccc(c1)/C=C/C(=O)O)O)O
DCA		B2	c1(c(c(cc(c1)/C=C/C(=O)O)c1cc(cc(c1O)O)/C=C/C(=O)O)O)O
HCA	Hydrocaffeic acid	B3	c1(c(ccc(c1)CCC(=O)O)O)O
DHCA		B3	c1(c(c(cc(c1)CCC(=O)O)c1cc(cc(c1O)O)CCC(=O)O)O)O

## Sheet: PAMPA, MAD, Solubility, HIA, Ro
ID	Group	logD at pH 7.4	TPSA / MW	Predicted log Pm at pH 7.4 (cm/s)	S at pH 6.5 (mg/ml)	MAD (mg)	HIA (100 mg dose)	Ro5
Cr	A1	2.02	0.213	-3.46	4.25	27.7274	0.277274	Good
DCr	A1	3.72	0.215	-2.68	0.02	0.286543	0.00286543	Good
Va	A1	-0.89	0.306	-5.8	18.65	11.4889	0.114889	Good
DVa	A1	1.53	0.308	-4.7	0.53	0.990093	0.00990093	Good
Apo	A1	1.02	0.28	-4.64	6.95	13.7932	0.137932	Good
DApo	A1	1.55	0.282	-4.41	0.07	0.175194	0.00175194	Good
Eu	A1	2.61	0.18	-2.82	0.91	11.3209	0.113209	Good
DEu	A1	4.89	0.181	-1.77	0	0	0	Good
iso-Eu	A1	2.63	0.18	-2.81	0.74	9.29933	0.0929933	Good
Diso-Eu	A1	4.94	0.181	-1.75	0	0	0	Good
FA	A2	-1.86	0.344	-6.66	540.61	139.896	1	Good
DFA	A2	-4.04	0.346	-7.7	386.36	35.0261	0.350261	Good
M1	A2	2	0.242	-3.78	3.16	14.9296	0.149296	Good
D1	A2	3.66	0.244	-3.02	0.01	0.101681	0.00101681	Good
M6	A2	2.08	0.285	-4.2	0.93	2.87662	0.0287662	Good
D6	A2	3.92	0.286	-3.36	0	0	0	Good
M7	A2	2.7	0.269	-3.74	0.36	1.77085	0.0177085	Good
M3	A2	2.41	0.319	-4.4	0.48	1.2135	0.012135	Good
D3	A2	4.47	0.32	-3.46	0	0	0	Bad
Curc	A2	4.06	0.261	-3.02	0.04	0.406724	0.00406724	Good
HFA	A3	-1.94	0.34	-6.66	2044.66	529.104	1	Good
DHFA	A3	-4.2	0.342	-7.73	390.39	34.3367	0.343367	Good
M2	A3	1.92	0.24	-3.79	11.89	55.6111	0.556111	Good
D2	A3	3.51	0.241	-3.06	0.19	1.85555	0.0185555	Good
M4	A3	2.08	0.283	-4.17	3.53	11.2542	0.112542	Good
D4	A3	3.87	0.284	-3.35	0.02	0.145791	0.00145791	Good
M5	A3	3.54	0.224	-2.86	0.31	3.70409	0.0370409	Good
D5	A3	6.78	0.225	-1.36	0	0	0	Moderate
M8	A3	4.05	0.214	-2.52	0.08	1.34688	0.0134688	Good
D8	A3	7.81	0.215	-0.776	0	0	0	Moderate
M9	A3	5.07	0.188	-1.77	0.01	0.358707	0.00358707	Good
D9	A3	9.86	0.189	0.452	0	0	0	Bad
HCh	B1	2.46	0.27	-3.86	2.23	9.71907	0.0971907	Good
DHCh	B1	4.58	0.271	-2.89	0.01	0.115926	0.00115926	Good
HPh	B2	1.85	0.323	-4.71	7.78	14.388	0.14388	Good
DHPh	B2	3.33	0.325	-4.04	0.08	0.290784	0.00290784	Good
CA	B2	-2	0.432	-7.67	1334.01	124.652	1	Good
DCA	B2	-4.35	0.434	-8.79	358.3	10.82	0.1082	Moderate
HCA	B3	-2.09	0.427	-7.66	5046.38	476.321	1	Good
DHCA	B3	-4.51	0.429	-8.81	362.33	10.7232	0.107232	Moderate
		Legend:
			medium-to-good HIA (≥ 20%)
			not reliable (outside of the applicability domain of PAMPA Pm model)
		logD at pH 7.4	the logarithm of the apparent octanol-water distribution coefficient at pH 7.4
		TPSA	Topographic Polar Surface Area
		MAD	Maximal absorbable dose
		HIA	Human Intestinal Absorption
		Ro5	Lipinski Rule of 5

## Sheet: P-gp, CYP
ID	Group	ACD/Percepta prediction
		P-gp inhibitor probability	P-gp substrate probability	P-gp-binder probabiliy	CYP3A4 Substrate probability	CYP2D6 Substrate probability	CYP2C9 Substrate probability	CYP2C19 Substrate probability	CYP1A2 Substrate probability	CYP (any type) Substrate probability
Cr	A1	0.03	0.05	0.05	0.08	0.02	0.07	0.06	0.5	0.5
DCr	A1	0.07	0.11	0.11	0.45	0.05	0.3	0.44	0.71	0.71
Va	A1	0.03	0.04	0.04	0.04	0.01	0.01	0.01	0.48	0.48
DVa	A1	0.04	0.08	0.08	0.27	0.02	0.02	0.04	0.53	0.53
Apo	A1	0.06	0.05	0.06	0.08	0.02	0.01	0.03	0.58	0.58
DApo	A1	0.22	0.11	0.22	0.35	0.03	0.03	0.15	0.63	0.63
Eu	A1	0.05	0.06	0.06	0.04	0.06	0.13	0.12	0.75	0.75
DEu	A1	0.16	0.13	0.16	0.31	0.11	0.26	0.61	0.38	0.61
iso-Eu	A1	0.04	0.05	0.05	0.07	0.09	0.02	0.09	0.71	0.71
Diso-Eu	A1	0.13	0.09	0.13	0.36	0.12	0.05	0.16	0.64	0.64
FA	A2	0.01	0.02	0.02	0.01	0.01	0.15	0	0.15	0.15
DFA	A2	0.01	0.02	0.02	0.01	0	0.01	0	0.02	0.02
M1	A2	0.1	0.05	0.1	0.06	0.05	0.02	0.02	0.71	0.71
D1	A2	0.57	0.15	0.57	0.38	0.02	0.01	0.02	0.65	0.65
M6	A2	0.09	0.04	0.09	0.02	0.01	0.13	0	0.55	0.55
D6	A2	0.6	0.12	0.6	0.09	0	0.01	0	0.28	0.28
M7	A2	0.1	0.05	0.1	0.04	0.01	0.12	0.01	0.43	0.43
M3	A2	0.14	0.06	0.14	0.07	0	0.07	0	0.37	0.37
D3	A2	0.7	0.14	0.7	0.11	0	0	0	0.19	0.19
Curc	A2	0.4	0.08	0.4	0.1	0	0.06	0.01	0.2	0.2
HFA	A3	0.01	0.03	0.03	0.01	0	0.34	0	0.08	0.34
DHFA	A3	0	0.02	0.02	0.02	0	0.09	0.01	0	0.09
M2	A3	0.06	0.07	0.07	0.06	0.05	0.08	0.2	0.6	0.6
D2	A3	0.21	0.2	0.21	0.59	0.01	0.24	0.61	0.22	0.61
M4	A3	0.08	0.06	0.08	0.03	0.01	0.48	0.08	0.47	0.48
D4	A3	0.39	0.21	0.39	0.15	0	0.09	0.02	0.05	0.15
M5	A3	0.19	0.09	0.19	0.2	0.02	0.5	0.13	0.13	0.5
D5	A3	0.76	0.46	0.76	0.59	0	0.15	0	0.01	0.59
M8	A3	0.22	0.11	0.22	0.28	0.03	0.67	0.12	0.16	0.67
D8	A3	0.84	0.57	0.84	0.66	0	0.31	0	0.02	0.66
M9	A3	0.42	0.24	0.42	0.75	0.01	0.65	0.04	0.04	0.75
D9	A3	0.94	0.83	0.94	0.88	0	0.39	0	0	0.88
HCh	B1	0.02	0.04	0.04	0.02	0.01	0.1	0.09	0.52	0.52
DHCh	B1	0.03	0.06	0.06	0.06	0	0.43	0.71	0.45	0.71
HPh	B2	0.04	0.03	0.04	0.03	0	0.03	0.05	0.56	0.56
DHPh	B2	0.09	0.12	0.12	0.08	0	0.03	0.06	0.41	0.41
CA	B2	0	0.01	0.01	0	0	0.15	0	0.07	0.15
DCA	B2	0	0	0	0	0	0.03	0	0.02	0.03
HCA	B3	0	0.02	0.02	0	0	0.35	0	0.02	0.35
DHCA	B3	0	0.01	0.01	0	0	0.25	0.03	0	0.25
		Legend:
			probability ≥ 0.2
			not reliable (outside of the applicability domain of the ACD/Percepta models)
		P-gp	P-glycoprotein (ABCB1)
		CYP	Cytochrome P-450

## Sheet: Toxicity
ID	Group	DEREK Nеxus prediction						ACD/Percepta prediction
		# of alerts	Hepatotoxicity 1	Hepatotoxicity 2	Hepatotoxicity level of likelihood	Carcinogenicity 1	Carcinogenicity level of likelihood	LD50 =< 2000 mg/kg probability	LD50 =< 5000 mg/kg probability	Hazard category	Probability of positive Ames test	hERG Inhibitor (Ki < 10 uM) probability	ERα logRBA > 0 probability
Cr	A1	1		666	plausible			0.68	0.96	IV	0.07	0.02	0.01
DCr	A1	1		666	plausible			0.54	0.91	IV	0.15	0.05	0.01
Va	A1	0						0.61	0.94	IV	0.07	0.01	0.01
DVa	A1	0						0.39	0.87	V	0.24	0.03	0.01
Apo	A1	0						0.9	0.99	IV	0.07	0.01	0.01
DApo	A1	0						0.9	0.99	IV	0.17	0.04	0
Eu	A1	1		666	PROBABLE			0.69	0.96	IV	0.06	0.05	0.02
DEu	A1	1		666	plausible			0.47	0.89	V	0.18	0.35	0.16
iso-Eu	A1	1		666	plausible			0.66	0.95	IV	0.09	0.05	0.02
Diso-Eu	A1	1		666	plausible			0.38	0.85	V	0.28	0.32	0.16
FA	A2	0						0.26	0.76	V	0.07	0.01	0.01
DFA	A2	0						0.08	0.43	V	0.1	0.05	0
M1	A2	0						0.64	0.92	IV	0.29	0.07	0.01
D1	A2	0						0.46	0.85	V	0.6	0.28	0
M6	A2	0						0.63	0.92	IV	0.23	0.08	0.01
D6	A2	0						0.36	0.8	V	0.58	0.26	0
M7	A2	0						0.6	0.91	IV	0.27	0.11	0.01
M3	A2	0						0.65	0.92	IV	0.22	0.06	0.01
D3	A2	0						0.45	0.83	V	0.47	0.23	0
Curc	A2	0						0.45	0.86	V	0.17	0.24	0.03
HFA	A3	2	620	666	plausible			0.38	0.83	V	0.06	0	0.01
DHFA	A3	2	620	666	plausible			0.1	0.44	V	0.08	0.04	0.01
M2	A3	1		666	plausible			0.4	0.87	V	0.08	0.02	0.04
D2	A3	1		666	plausible			0.26	0.76	V	0.1	0.15	0.03
M4	A3	1		666	plausible			0.58	0.91	IV	0.22	0.02	0.01
D4	A3	1		666	plausible			0.35	0.78	V	0.37	0.23	0
M5	A3	1		666	plausible			0.63	0.92	IV	0.15	0.08	0.01
D5	A3	1		666	plausible			0.55	0.88	IV	0.14	0.45	0.02
M8	A3	1		666	plausible			0.62	0.91	IV	0.16	0.09	0.01
D8	A3	1		666	plausible			0.54	0.87	IV	0.15	0.57	0.02
M9	A3	1		666	plausible			0.49	0.87	V	0.06	0.21	0.13
D9	A3	1		666	plausible			0.44	0.83	V	0.06	0.64	0.01
HCh	B1	2		666	plausible	251	plausible	0.77	0.96	IV	0.06	0.02	0.02
DHCh	B1	1		666	plausible			0.53	0.9	IV	0.13	0.07	0.13
HPh	B2	1				251	plausible	0.68	0.93	IV	0.19	0.01	0.01
DHPh	B2	0						0.47	0.85	V	0.53	0.08	0
CA	B2	1				251	plausible	0.29	0.77	V	0.05	0	0.01
DCA	B2	0						0.1	0.46	V	0.06	0.01	0
HCA	B3	3	620	666	plausible	251	plausible	0.52	0.9	IV	0.06	0	0.01
DHCA	B3	2	620	666	plausible			0.07	0.39	V	0.06	0.01	0.01
		Legend:
			level of likelyhood ≥ PROBABLE
			compound in training set
			not reliable (outside of the applicability domain of the ACD/Percepta models)
		Hepatotoxicity alert 620	2-Arylacetic or 3-arylpropionic acid
		Hepatotoxicity alert 666	para-Alkylphenol or derivative
		Carcinogenicity alert 251	Catechol with less than 15 heavy atoms
